# Supplementary material for: Co-Inflammatory Roles of TGFβ1 in the Presence of TNFα Drive a Pro-inflammatory Fate in Mesenchymal Stem Cells
Source: PubMed Central journal article supplement (PMC5425596; doi:10.3389/fimmu.2017.00479), 2017-05-11
Supplement: Data_Sheet_1.pdf [file Data_Sheet_1.pdf]

*Supplementary Materials*

**Co-inflammatory roles of TGF $\beta$ 1 in the presence of TNF $\alpha$  drive  
a pro-inflammatory fate in mesenchymal stem cells**

S. Lerrer, Y. Liubomirski, A. Bott, K. Abnaof, N. Oren, A. Yousaf, C. Körner, T. Meshel, S. Wiemann, A. Ben-Baruch

**Corresponding author**

Adit Ben-Baruch  
aditbb@tauex.tau.ac.il

## A. Experimental setup

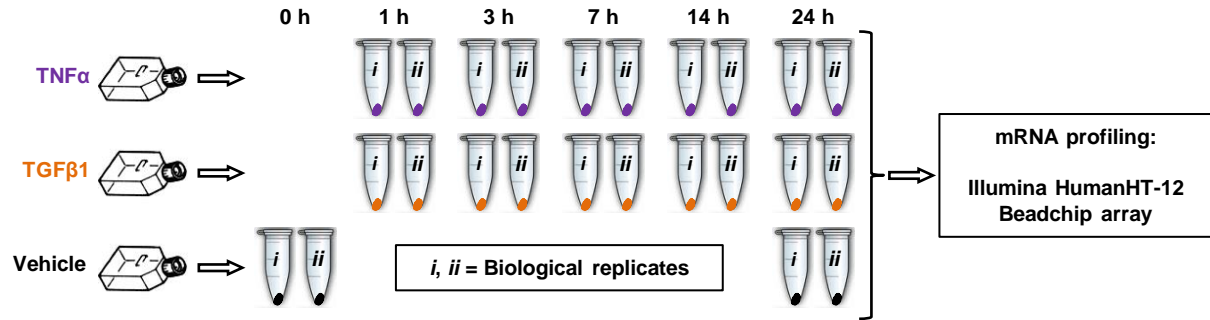

## B. Unsupervised mRNA clustering

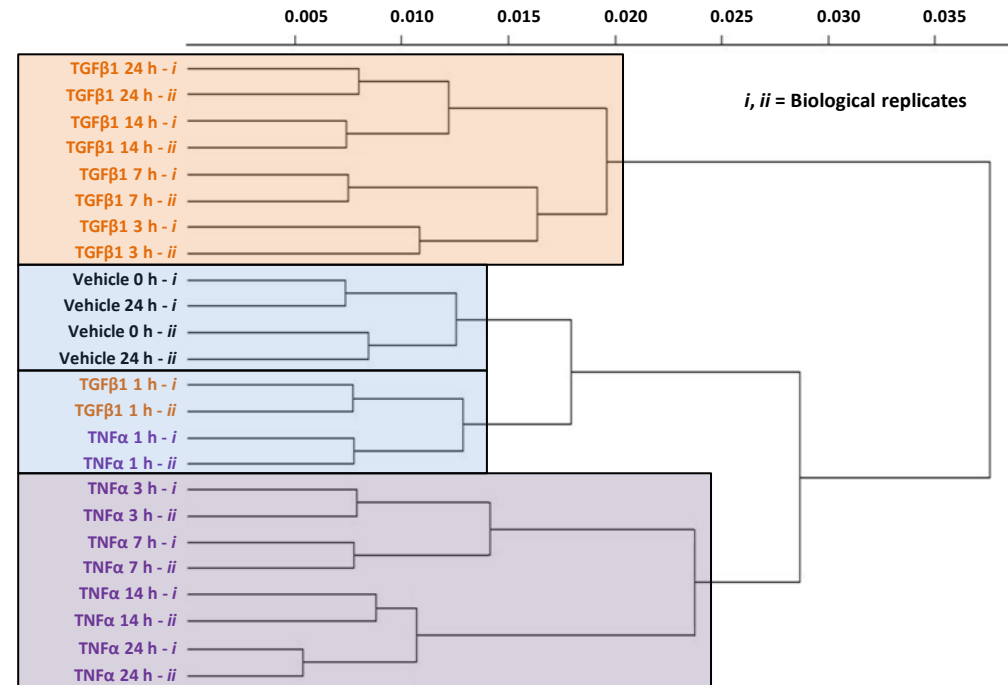

### **Supplementary Figure 1**

#### **Experimental setup of MSC stimulation by TNF $\alpha$ and TGF $\beta$ 1 for mRNA arrays, and data of unsupervised clustering**

Human BM-derived MSCs were stimulated with TNF $\alpha$  (50ng/ml) or TGF $\beta$ 1 (10ng/ml), or treated by a vehicle control. Cytokine concentrations were selected as described in “Materials and methods”. (A) For mRNA arrays, MSCs of Donor #1 were stimulated by the cytokines for the indicated time points, in two separate biological repeats (“*i*”, “*ii*”). qPCR validations of 18 up-regulated mRNAs were performed in MSCs of Donors #2 and #3, as demonstrated in Figure 3. (B) Unsupervised clustering of total mRNAs included in the array.

## METABRIC: Target correlations

CXCL8 – CCL2

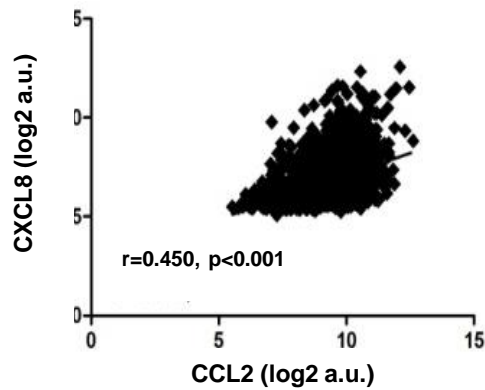

Cox-2 – CCL2

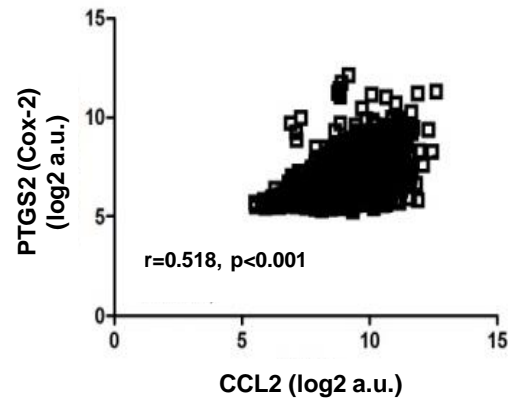

Cox-2 – CXCL8

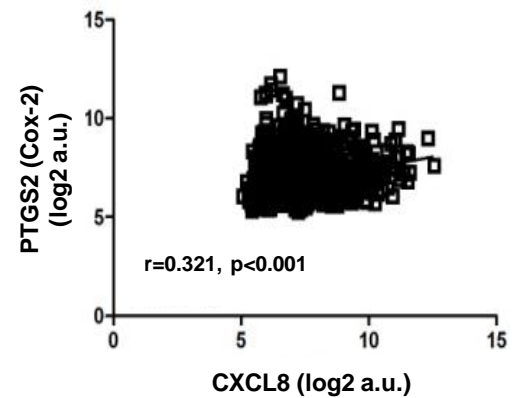

### Supplementary Figure 2

#### **Coordinated expression of CCL2, CXCL8 and Cox-2 in patient samples of the METABRIC dataset**

The METABRIC dataset, consisting of 1992 samples of breast cancer patients, was used to determine the correlations between CCL2, CXCL8 and PTGS2 (Cox-2) expression levels. a.u., Arbitrary Units. Similar analysis performed with the TCGA dataset of patient samples is demonstrated in Figure 4. Details on statistical analysis are provided in Figure 4B.

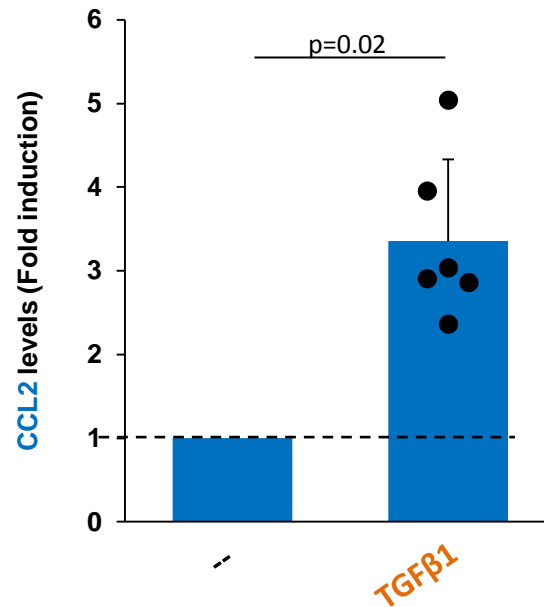

### **Supplementary Figure 3**

#### **TGFβ1 stimulation elevates the protein expression levels of CCL2 in MSCs**

Human BM-derived MSCs were stimulated with TGFβ1 (10ng/ml) for 24 hours, or treated by a vehicle control (--). CCL2 levels in cell supernatants were determined by ELISA, at the linear range of absorbance. The figure demonstrates fold change of CCL2 release, independently determined in MSCs of 6 different donors. The bar represents mean  $\pm$  SD and each dot represents the fold change value obtained in one donor out of the 6 different MSCs donors.

### A. p65 siRNA: Efficacy

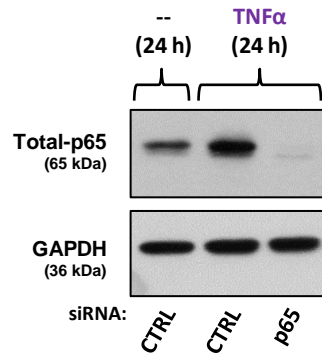

### B. Smad3 siRNA: Efficacy

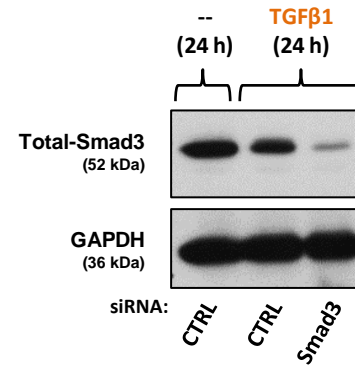

### C.

#### C1. p65 siRNA: Efficacy

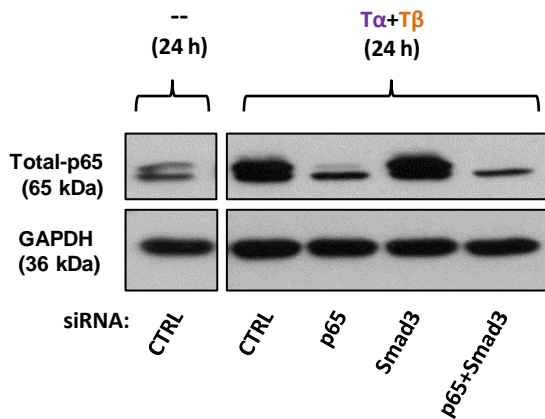

#### C2. Smad3 siRNA: Efficacy

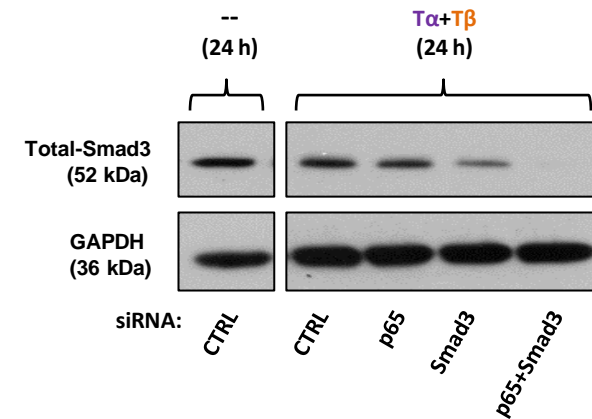

## Supplementary Figure 4

### Efficacy of p65 or Smad3 down-regulation following siRNA transfection

The figure complements the data of Figure 6 by demonstrating the efficacy of siRNA-mediated down-regulation of p65 and Smad3 expression, as appropriate. (A) Efficacy of p65 down-regulation by p65 siRNA, in TNF $\alpha$ -stimulated MSCs used in Figure 6A. (B) Efficacy of Smad3 down-regulation by Smad3 siRNA, in TGF $\beta$ 1-stimulated MSCs used in Figure 6B. (C) Efficacies of p65 and Smad3 down-regulations by siRNA to p65 and Smad3, in TNF $\alpha$ +TGF $\beta$ 1-stimulated MSCs used in Figure 6C.

**A.**

A1. p65 siRNA: Efficacy

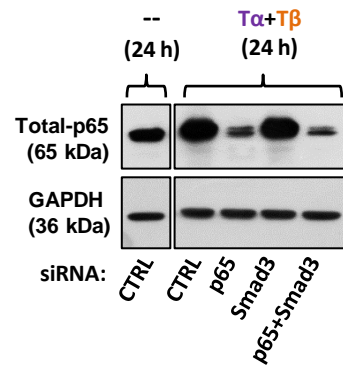

A2. Smad3 siRNA: Efficacy

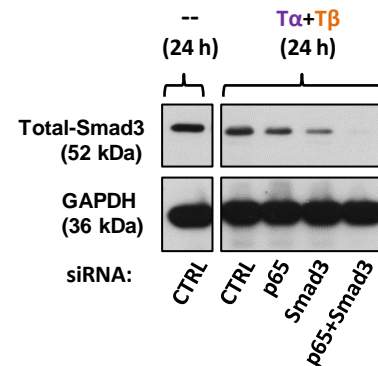

**B.**

B1. p65/Smad3 siRNAs: CCL2

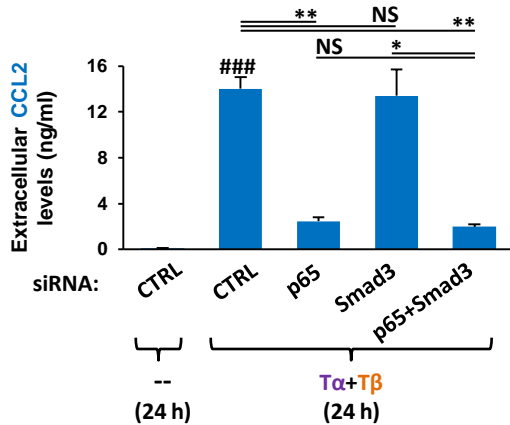

B2. p65/Smad3 siRNAs: CXCL8

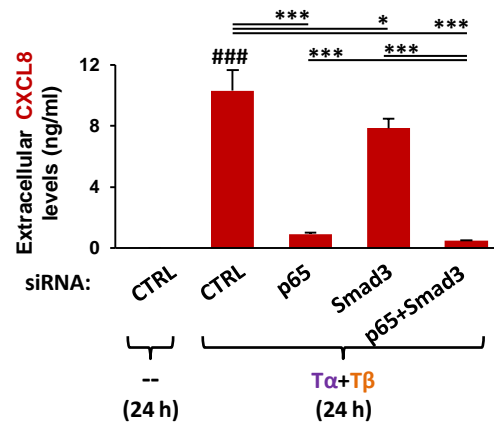

B3. p65/Smad3 siRNAs: Cox-2

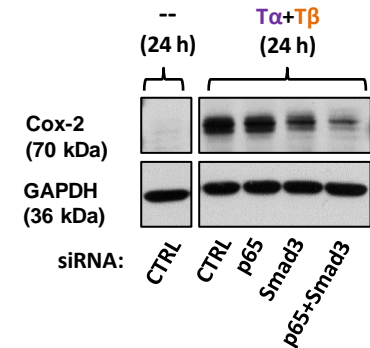

**Supplementary Figure 5**

**Roles of p65 and Smad3 in regulating TNFα+TGFβ1-cooperatively-induced CCL2/CXCL8 and Cox-2 expression in MSCs – Another donor**

The figure complements the findings presented in Figures 6C and Supplementary Figure 4C, by showing similar findings in another donor (out of total n=3 independent experiments). The different experimental parts of the figure were performed in parallel, using MSCs of the same donor.

\*p≤0.05, \*\*p≤0.01, \*\*\*p≤0.001. ###p≤0.001 compared to vehicle-treated, control siRNA-transfected cells. NS, Not Significant.

## A. TAK1 siRNA: Efficacy in signaling exps (10 min stim.) and impact on p38 activation

### A1. TAK1 siRNA: Efficacy

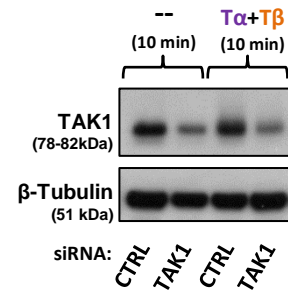

### A2. TAK1 siRNA: p38

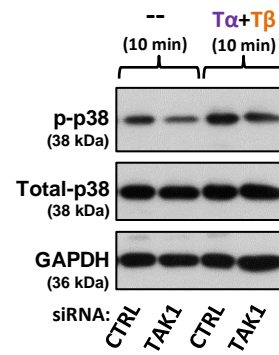

## B. TAK1 siRNA: Efficacy in functional exps (24 hr stim.)

### B1. TAK siRNA: Efficacy for CCL2 and CXCL8 exp.

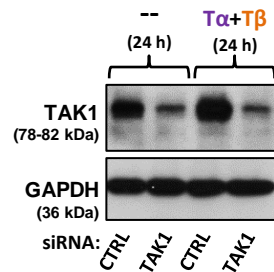

### B2. TAK siRNA: Efficacy for Cox-2 exp.

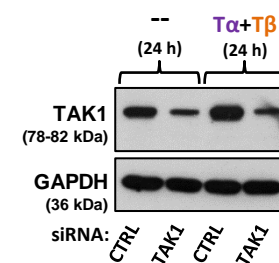

## Supplementary Figure 6

### The impact of TAK1 down-regulation on p38 activation and efficacy of TAK1 siRNA in the different relevant experiments

The figure complements the data of Figure 7. (A) TAK1 siRNA in signaling experiments. (A1) Efficacy of TAK1 down-regulation in  $TNF\alpha+TGF\beta1$ -stimulated MSCs used in Figure 7B ( $I\kappa B\alpha$  expression and p65 and Smad3 activation). Following the siRNA transfection procedure, MSCs were stimulated by the cytokines for 10 minutes. (A2) Following TAK1 down-regulation by siRNA, as demonstrated in Supplementary Figure 6A1, p38 activation was determined in the same MSCs. The findings are representatives of  $n=3$  independent experiments, performed with MSCs of 2 different donors, which have shown similar results. (B) TAK1 siRNA in functional assays in which following siRNA transfection, the MSCs were stimulated for 24 hours with  $TNF\alpha+TGF\beta1$  (no rapid signaling events are expected at this later time point). The findings were obtained with the MSCs used in Figure 7C. (B1) TAK1 down-regulation in analyses of CCL2 and CXCL8 expression (shown in Fig. 7C1, 6C2). (B2) TAK1 down-regulation in analyses of Cox-2 expression (shown in Fig. 7C3).

**A. TAK1 siRNA: Efficacy in signaling expts and impact on I $\kappa$ B $\alpha$  expression and on p65, Smad3 and p38 activation (10 min stim.)**

**A1. TAK1 siRNA: Efficacy**

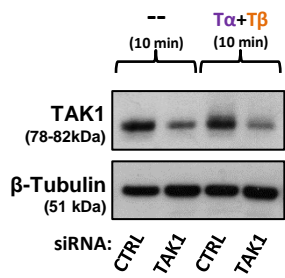

**A2. TAK1 siRNA: I $\kappa$ B $\alpha$**

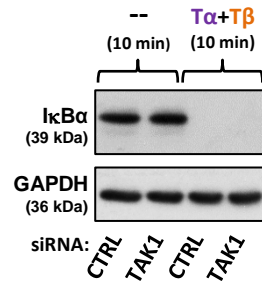

**A3. TAK1 siRNA: p65**

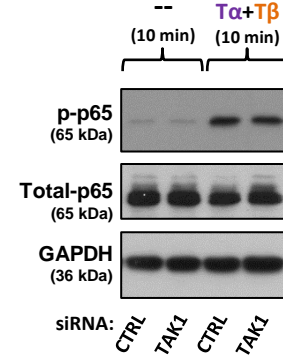

**A4. TAK1 siRNA: Smad3 and p38**

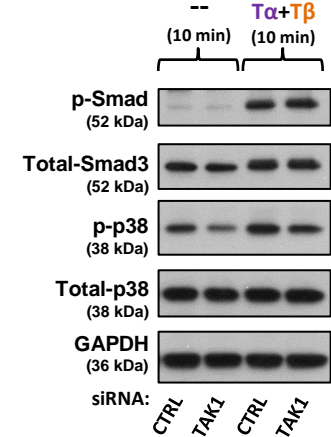

**B. TAK1 siRNA: Efficacy in CCL2/CXCL8 expts and impact on CCL2/CXCL8 expression (24 hr stim.)**

**B1. TAK1 siRNA: Efficacy**

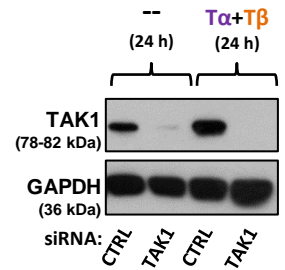

**B2. TAK1 siRNA: CCL2 and CXCL8**

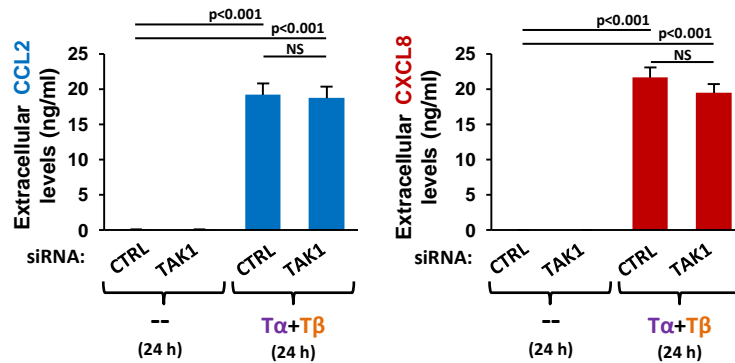

**C. TAK1 siRNA: Efficacy in Cox-2 exp. and impact on Cox-2 expression (24 hr stim.)**

**C1. TAK1 siRNA: Efficacy**

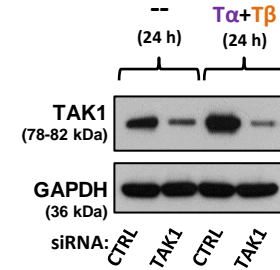

**C2. TAK1 siRNA: Cox-2**

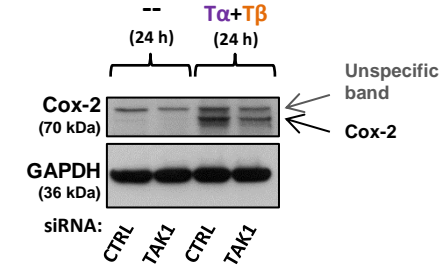

**Supplementary Figure 7**

**Roles of TAK1 in regulating TNF $\alpha$ +TGF $\beta$ 1-cooperatively-induced CCL2/CXCL8 and Cox-2 expression in MSCs – Another donor**

The figure complements the findings presented in Figure 7 and in Supplementary Figure 6, by showing similar findings in another donor (out of total n=3 independent experiments). The different experimental parts of the figure were performed in parallel. More details are provided in the legends of Figure 7 and of Supplementary Figure 6 (note details about stimulation time).



## CM of MSCs: Morphological changes in MDA-MB-231 breast tumor cells

1. Control medium

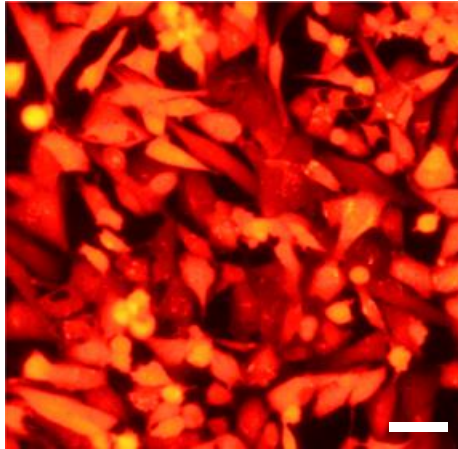

2.  $T\alpha+T\beta$

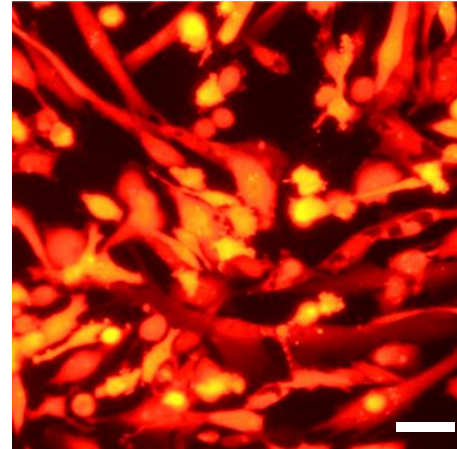

3. CM of Control-MSCs

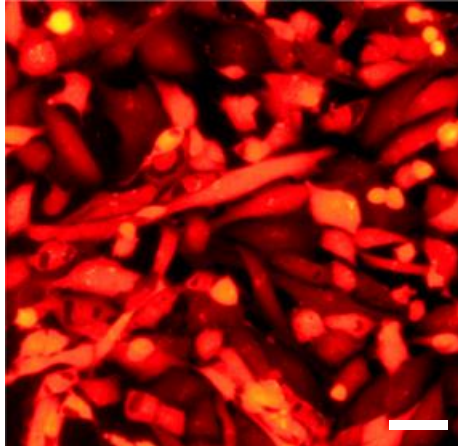

4. CM of  $T\alpha+T\beta$ -stimulated MSCs

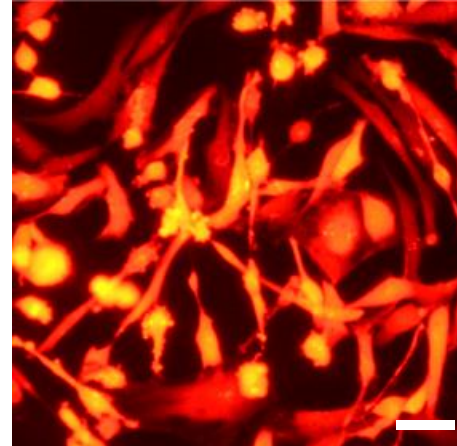

### Supplementary Figure 8

**Factors released by  $TNF\alpha+TGF\beta 1$ -stimulated MSCs induce cellular elongation in MDA-MB-231 breast cancer cells – Another experiment**

The figure complements the findings of Figure 8A by showing higher magnification of cells (Scale bar =  $50\mu m$ ), in another independent experiment (out of total  $n>3$  independent experiments).

| GO.bp ID   | GO.bp Term                                                             | Size | 3h           |               | 7h           |               | 14h          |               | 24h          |               |
|------------|------------------------------------------------------------------------|------|--------------|---------------|--------------|---------------|--------------|---------------|--------------|---------------|
|            |                                                                        |      | TNF $\alpha$ | TGF $\beta$ 1 | TNF $\alpha$ | TGF $\beta$ 1 | TNF $\alpha$ | TGF $\beta$ 1 | TNF $\alpha$ | TGF $\beta$ 1 |
| GO:0006351 | transcription- DNA-templated                                           | 1838 | 2.34E-16     | 1.97E-11      | 1.35E-13     | 1.44E-14      | 3.10E-05     | 3.73E-07      |              |               |
| GO:0044281 | small molecule metabolic process                                       | 1483 | 2.72E-03     | 8.49E-03      | 6.52E-10     | 1.90E-09      | 4.73E-16     | 1.39E-12      | 1.93E-20     | 2.23E-12      |
| GO:0006355 | regulation of transcription- DNA-templated                             | 1312 | 1.22E-07     | 2.55E-06      | 4.22E-05     | 5.40E-07      |              | 1.56E-03      |              |               |
| GO:0007165 | signal transduction                                                    | 988  |              |               | 5.03E-03     |               | 5.25E-05     | 1.71E-04      | 1.94E-03     | 2.29E-04      |
| GO:0045944 | positive regulation of transcription from RNA polymerase II promoter   | 969  | 7.01E-10     | 7.22E-11      | 2.44E-11     | 2.26E-12      | 7.07E-05     | 7.85E-10      | 1.31E-04     | 5.54E-05      |
| GO:0010467 | gene expression                                                        | 881  | 1.81E-07     | 2.20E-08      | 9.70E-15     | 2.73E-21      | 6.36E-12     | 4.80E-16      | 1.87E-07     | 1.55E-07      |
| GO:0045087 | innate immune response                                                 | 838  |              |               | 1.99E-07     | 8.71E-03      |              | 2.46E-03      |              |               |
| GO:0007186 | G-protein coupled receptor signaling pathway                           | 837  | 3.57E-07     |               | 7.59E-06     | 1.62E-10      | 1.06E-05     | 4.18E-04      |              | 3.30E-04      |
| GO:0000122 | negative regulation of transcription from RNA polymerase II promoter   | 725  | 5.66E-09     | 1.79E-06      | 3.33E-08     | 1.91E-11      | 6.80E-03     | 7.79E-05      |              |               |
| GO:0007264 | small GTPase mediated signal transduction                              | 653  | 8.64E-05     | 8.73E-06      | 8.27E-04     | 8.71E-11      |              | 4.04E-04      |              |               |
| GO:0044267 | cellular protein metabolic process                                     | 640  | 2.99E-03     |               | 1.35E-10     | 9.17E-11      | 4.02E-10     | 6.56E-15      | 8.95E-05     | 3.76E-12      |
| GO:0006915 | apoptotic process                                                      | 610  | 6.61E-05     | 1.25E-04      | 4.69E-09     | 3.41E-08      | 4.69E-09     | 2.78E-09      | 1.61E-08     | 2.24E-04      |
| GO:0055114 | oxidation-reduction process                                            | 582  |              |               | 1.31E-03     | 8.20E-04      | 6.29E-06     | 9.74E-06      | 2.28E-07     |               |
| GO:0016032 | viral process                                                          | 566  | 4.06E-06     |               | 1.82E-09     | 2.56E-09      | 6.55E-08     | 2.92E-14      | 3.41E-07     | 1.98E-05      |
| GO:0006366 | transcription from RNA polymerase II promoter                          | 554  | 9.31E-09     | 4.60E-04      | 2.34E-05     | 7.37E-08      | 1.50E-03     | 1.33E-05      |              | 3.42E-03      |
| GO:0007411 | axon guidance                                                          | 540  |              |               | 7.39E-03     | 1.45E-06      |              |               |              | 7.42E-03      |
| GO:0045893 | positive regulation of transcription- DNA-templated                    | 511  | 1.42E-06     | 2.67E-08      | 2.12E-06     | 1.74E-08      | 9.19E-05     | 2.76E-04      |              |               |
| GO:0043066 | negative regulation of apoptotic process                               | 486  | 9.08E-05     |               | 1.51E-07     | 4.26E-09      | 2.67E-09     | 1.72E-04      | 8.90E-06     |               |
| GO:0043547 | positive regulation of GTPase activity                                 | 485  | 2.02E-03     | 2.32E-03      |              |               |              |               |              |               |
| GO:0045892 | negative regulation of transcription- DNA-templated                    | 482  | 6.85E-04     |               | 1.14E-06     | 5.91E-03      |              | 2.53E-05      |              |               |
| GO:0000278 | mitotic cell cycle                                                     | 434  | 1.85E-06     | 1.19E-04      | 1.12E-09     | 8.76E-12      | 1.91E-08     |               | 1.09E-12     |               |
| GO:0048011 | neurotrophin TRK receptor signaling pathway                            | 397  |              |               | 1.96E-08     | 5.00E-07      |              |               |              |               |
| GO:0050911 | detection of chemical stimulus involved in sensory perception of smell | 380  | 1.62E-08     |               | 4.68E-07     | 1.39E-12      | 5.07E-08     | 2.01E-09      | 1.12E-04     | 3.34E-04      |
| GO:0016567 | protein ubiquitination                                                 | 363  | 2.34E-03     | 1.51E-03      | 6.83E-03     | 2.84E-07      |              | 2.17E-05      |              |               |
| GO:0008283 | cell proliferation                                                     | 355  | 2.34E-03     |               | 6.50E-03     | 5.05E-06      | 1.58E-04     | 2.34E-03      | 2.30E-04     |               |
| GO:0015031 | protein transport                                                      | 346  |              |               | 1.35E-06     | 1.07E-06      | 8.20E-04     | 1.39E-04      | 1.92E-03     | 6.53E-06      |
| GO:0051301 | cell division                                                          | 331  | 2.55E-05     |               | 2.77E-04     | 2.16E-07      |              | 1.27E-06      | 2.72E-07     |               |
| GO:0007173 | epidermal growth factor receptor signaling pathway                     | 324  |              |               | 1.74E-04     | 1.65E-03      |              |               |              |               |
| GO:0043687 | post-translational protein modification                                | 316  |              |               | 4.33E-05     | 9.58E-03      |              |               |              | 7.32E-05      |
| GO:0030198 | extracellular matrix organization                                      | 313  |              |               |              |               | 8.47E-05     | 3.92E-04      | 4.04E-07     |               |
| GO:0038095 | Fc-epsilon receptor signaling pathway                                  | 301  |              |               | 2.79E-04     | 2.17E-03      |              |               |              |               |
| GO:0006996 | organelle organization                                                 | 298  | 4.09E-03     |               |              | 4.91E-05      | 7.77E-05     | 1.37E-07      | 7.32E-03     | 4.80E-05      |
| GO:0006281 | DNA repair                                                             | 292  | 2.81E-06     | 1.96E-04      | 3.02E-03     | 2.21E-06      |              | 7.40E-04      | 8.28E-05     |               |
| GO:0008543 | fibroblast growth factor receptor signaling pathway                    | 291  |              |               | 1.54E-04     | 1.35E-03      |              |               |              |               |
| GO:0048010 | vascular endothelial growth factor receptor signaling pathway          | 284  |              |               | 3.38E-03     | 3.41E-04      |              |               |              |               |
| GO:0043065 | positive regulation of apoptotic process                               | 281  | 6.79E-05     | 6.23E-03      | 6.44E-08     | 4.30E-05      | 1.14E-05     | 1.87E-06      | 5.72E-04     |               |
| GO:0006367 | transcription initiation from RNA polymerase II promoter               | 260  |              |               |              | 2.08E-03      |              | 2.27E-03      | 4.00E-03     |               |
| GO:0008380 | RNA splicing                                                           | 251  | 7.12E-03     |               | 1.08E-04     | 7.91E-11      |              | 8.79E-04      |              |               |
| GO:0007265 | Ras protein signal transduction                                        | 244  |              |               | 8.21E-03     | 3.88E-03      |              |               |              |               |
| GO:0007067 | mitotic nuclear division                                               | 241  | 1.62E-05     |               | 7.67E-04     | 1.39E-03      |              | 1.33E-05      | 5.65E-07     |               |
| GO:0006886 | intracellular protein transport                                        | 235  |              |               | 8.58E-04     | 2.21E-06      |              | 1.52E-09      |              | 2.99E-03      |
| GO:0000186 | activation of MAPKK activity                                           | 232  |              |               | 3.09E-03     | 1.66E-03      |              |               |              |               |
| GO:0001525 | angiogenesis                                                           | 227  |              |               | 9.53E-03     | 4.11E-03      |              | 5.66E-04      |              |               |
| GO:0001701 | in utero embryonic development                                         | 216  | 1.09E-04     | 1.74E-03      | 1.03E-03     | 3.07E-06      |              |               |              |               |
| GO:0007608 | sensory perception of smell                                            | 213  | 3.80E-07     |               | 1.53E-03     | 4.91E-05      | 1.92E-04     | 6.45E-03      |              |               |
| GO:0000398 | mRNA splicing- via spliceosome                                         | 209  |              |               | 1.39E-03     | 1.33E-09      |              | 1.51E-07      |              | 1.33E-09      |
| GO:0061024 | membrane organization                                                  | 159  |              |               | 6.88E-03     | 2.90E-05      |              | 4.91E-05      |              | 1.08E-04      |
| GO:0000082 | G1/S transition of mitotic cell cycle                                  | 155  |              |               | 1.74E-04     | 3.01E-04      | 1.10E-04     |               |              |               |
| GO:0044255 | cellular lipid metabolic process                                       | 153  |              |               |              | 1.85E-03      | 4.38E-04     | 1.66E-04      | 1.61E-04     | 2.15E-04      |
| GO:0000086 | G2/M transition of mitotic cell cycle                                  | 141  |              |               | 3.02E-03     | 1.65E-03      |              |               | 1.60E-03     |               |
| GO:0006260 | DNA replication                                                        | 134  |              | 8.50E-03      | 9.50E-04     | 7.71E-03      | 1.51E-03     |               |              |               |
| GO:0030968 | endoplasmic reticulum unfolded protein response                        | 101  | 1.46E-03     |               | 5.21E-06     | 5.48E-05      | 1.40E-03     | 5.19E-05      |              | 7.72E-04      |
| GO:0002474 | antigen processing and presentation of peptide antigen via MHC class I | 99   |              |               | 2.15E-03     | 8.54E-03      |              |               |              |               |
| GO:0006364 | rRNA processing                                                        | 94   |              |               |              | 3.85E-06      | 9.40E-04     | 3.92E-04      |              | 4.08E-03      |
| GO:0034138 | toll-like receptor 3 signaling pathway                                 | 81   | 9.90E-03     |               | 5.75E-06     | 9.10E-03      | 2.96E-03     |               |              |               |
| GO:0031398 | positive regulation of protein ubiquitination                          | 63   | 6.05E-03     |               |              | 9.47E-03      |              |               |              |               |
| GO:0036498 | IRE1-mediated unfolded protein response                                | 55   |              |               | 5.96E-03     |               |              |               |              | 3.42E-03      |

## Supplementary Table 1

### Kinetics-based shifts in transcriptional programs induced by both TNF $\alpha$ and TGF $\beta$ 1 in MSCs

Gene ontology (GO) enrichment analysis of pathways that were modified by both TNF $\alpha$  and TGF $\beta$ 1 at one time point or more ( $p \leq 0.01$ , after BY correction for multiple-testing, compared to vehicle-treated cells).

The table indicates the p values of change of each GO term, at each specific time point following stimulation by TNF $\alpha$  or TGF $\beta$ 1. White squares – The response did not pass the required cut-off. Size = Number of genes that are included in the transcriptional program.

**Supplementary Table 2:  
Primers used in qPCR analyses**

**Supp. Table 2A**

| Gene    | Primer direction<br>(fw=forward, rv=reverse) | Sequence (5' -> 3')    |
|---------|----------------------------------------------|------------------------|
| PTGS2   | PTGS2_fw                                     | actctggctagacagcgtaa   |
|         | PTGS2_rv                                     | agatcatctctgcctgagtatc |
| CX3CL1  | CX3CL1_fw                                    | ccaccttctgccatctgac    |
|         | CX3CL1_rv                                    | atgttgcatcttcgtcacacc  |
| EPSTI1  | EPSTI1_fw                                    | aggcaaaagtcaaccaggtg   |
|         | EPSTI1_rv                                    | tgaaggccagataggagtcaa  |
| ANGPTL4 | ANGPTL4_fw                                   | gtggaccctgaggtccttc    |
|         | ANGPTL4_rv                                   | ccaccttggtgaagagttgc   |
| PTHLH   | PTHLH_fw                                     | ctcggtggagggtctcag     |
|         | PTHLH_rv                                     | tggatggacttccccttgt    |
| PLAU    | PLAU_fw                                      | ttgctcaccacaacgacatt   |
|         | PLAU_rv                                      | ggcaggcagatggtctgtat   |
| RPS9    | RPS9_fw                                      | aacttatgtgaccccgcgga   |
|         | RPS9_rv                                      | cagcttcagctcttggtcga   |

**Supp. Table 2B**

| Gene  | Primer direction<br>(fw=forward, rv=reverse) | Sequence (5' -> 3')      | UPL<br>Probe |
|-------|----------------------------------------------|--------------------------|--------------|
| CCL2  | CCL2_fw                                      | agtctctgccgcccttct       | #40          |
|       | CCL2_rv                                      | gtgactggggcattgattg      |              |
| CXCL8 | CXCL8_fw                                     | agacagcagagcacacaagc     | #72          |
|       | CXCL8_rv                                     | atggttccttccggtggt       |              |
| NGF   | NGF_fw                                       | tccggaccaataacagttt      | #32          |
|       | NGF_rv                                       | ggacattacgctatgcacctc    |              |
| IL6   | IL6_fw                                       | gatgagtacaaaagtcctgatcca | #40          |
|       | IL6_rv                                       | ctgcagccactggttctgt      |              |
| LIF   | LIF_fw                                       | tgccaatgccctctttattc     | #26          |
|       | LIF_rv                                       | gtccaggttggtgggaac       |              |
| HBEGF | HBEGF_fw                                     | tggggcttctcatgtttagg     | #55          |
|       | HBEGF_rv                                     | catgccaacttcactttctc     |              |
| CSF2  | CSF2_fw                                      | tctcagaaatgttgacctcca    | #1           |
|       | CSF2_rv                                      | gcccttgagcttggtgag       |              |

|       |          |                            |     |
|-------|----------|----------------------------|-----|
| MMP1  | MMP1_fw  | gctaacctttgatgctataactacga | #7  |
|       | MMP1_rv  | tttgtgcatgtagaatctg        |     |
| MMP3  | MMP3_fw  | caaacatatttctttagaggacaa   | #36 |
|       | MMP3_rv  | ttcagctatttgcttgggaaa      |     |
| VEGFC | VEGFC_fw | tgccagcaactaccacag         | #27 |
|       | VEGFC_rv | gtgattattccacatgtaattggtg  |     |
| FGF1  | FGF1_fw  | accaagtgattctgcttcc        | #56 |
|       | FGF1_rv  | cttgtggcgcttcaagac         |     |
| IL12A | IL12A_fw | cactccaaaacctgctgag        | #50 |
|       | IL12A_rv | caatcttcagaagtgaagg        |     |
| GAPDH | GAPDH_fw | agccacatcgctcagacac        | #60 |
|       | GAPDH_rv | gcccaatcgaccaaattcc        |     |
| HPRT  | HPRT_fw  | tgacctgatttttgcatacc       | #73 |
|       | HPRT_rv  | cgagcaagacgttcagtct        |     |
